# Supplementary material
Source: MDPI journal article supplement (https://www.mdpi.com/search?q=crystals-10-00467)
Supplement: s001 [file crystals-10-00467-s001.pdf]

# Supplementary Materials for

## Mineral vesicles and chemical gardens from carbonate-rich alkaline brines of Lake Magadi, Kenya

Melese Getenet, Juan Manuel García-Ruiz, Cristobal Verdugo-Escamilla and Isabel Guerra-Tschuschke

**This document includes legends for the videos and the following figures:**

- Figure S1: Powder X-ray diffraction of mineral gardens synthesized by immersing  $\text{CaCl}_2 \cdot 2\text{H}_2\text{O}$  pellets in Lake Magadi water
- Figure S2: Powder X-ray diffraction of mineral gardens produced by immersing  $\text{CoCl}_2 \cdot 6\text{H}_2\text{O}$  pellet in Magadi water
- Figure S3: Raman spectra of mineral vesicles synthesized by adding drops of saturated  $\text{CaCl}_2 \cdot 2\text{H}_2\text{O}$  solution onto Lake Magadi water
- Figure S4: EDX mapping of membrane cross-section of vesicles synthesized by adding saturated  $\text{CaCl}_2 \cdot 2\text{H}_2\text{O}$  solution onto Lake Magadi water
- Figure S5: EDX analysis of membrane cross-section of vesicles synthesized by adding saturated  $\text{CaCl}_2 \cdot 2\text{H}_2\text{O}$  solution onto Lake Magadi water
- Figure S6: EDX analysis of calcium mineral membrane cross-section containing gaylussite
- Figure S7: EDX analysis of membrane cross-section of vesicles synthesized by adding saturated  $\text{BaCl}_2 \cdot 2\text{H}_2\text{O}$  solution onto Lake Magadi water
- Figure S8: EDX mapping of membrane cross-section of vesicles synthesized by adding saturated  $\text{BaCl}_2 \cdot 2\text{H}_2\text{O}$  solution onto Lake Magadi water
- Figure S9: EDX analysis of the cross-section of mineral vesicles synthesized by adding saturated  $\text{MnCl}_2 \cdot 4\text{H}_2\text{O}$  solution onto Magadi water
- Figure S10: EDX analysis of the interior surface of mineral vesicles synthesized by adding saturated  $\text{MnCl}_2 \cdot 4\text{H}_2\text{O}$  solution onto Magadi water
- Figure S11: Powder X-ray diffraction of mineral vesicles synthesized by adding saturated  $\text{Co}(\text{NO}_3)_2 \cdot 6\text{H}_2\text{O}$  solution onto Lake Magadi water
- Figure S12: Powder X-ray diffraction of mineral vesicles synthesized by adding saturated  $\text{MgSO}_4$  solution onto Lake Magadi water
- Figure S13: Powder X-ray diffraction of mineral vesicles synthesized by adding saturated  $\text{ZnSO}_4 \cdot 7\text{H}_2\text{O}$  solution onto Lake Magadi water

**Other Supplementary Material for this manuscript includes the following:**

Video S1: Gas bubbling and bursting of reaction products of the  $\text{FeCl}_3$  pellet and Magadi water

Video S2: Gas bubbling and bursting of reaction products of the  $\text{CuCl}_2 \cdot 6\text{H}_2\text{O}$  pellet and Magadi water

Video S3: Gas bubbling and bursting of reaction products of the  $\text{ZnCl}_2$  pellet and Magadi water

Video S4: Growth process of mineral gardens by the interaction of the  $\text{CaCl}_2 \cdot 2\text{H}_2\text{O}$  pellet with Magadi water

Video S5: Growth process of mineral gardens by the interaction of the  $\text{Co}(\text{NO}_3)_2 \cdot 6\text{H}_2\text{O}$  salt pellet with Magadi water

Video S6: Gas bubbling and bursting upon the reaction of drops of saturated  $\text{FeCl}_3$  solution and Magadi water

Video S7: Gas bubbling and bursting upon the reaction of drops of saturated  $\text{CuCl}_2 \cdot 6\text{H}_2\text{O}$  solution and Magadi water

Video S8: Gas bubbling and bursting upon the reaction of drops of saturated  $\text{ZnCl}_2$  solution and Magadi water

Video S9: Synthesis of mineral vesicles by adding saturated  $\text{CaCl}_2 \cdot 2\text{H}_2\text{O}$  solution onto Magadi water

Video S10: Synthesis of mineral vesicles by adding saturated  $\text{BaCl}_2 \cdot 2\text{H}_2\text{O}$  solution onto Magadi water

Video S11: Synthesis of mineral vesicles by adding saturated  $\text{MnCl}_2 \cdot 4\text{H}_2\text{O}$  solution onto Magadi water

Video S12: Synthesis of mineral vesicles by adding saturated  $\text{CoCl}_2 \cdot 6\text{H}_2\text{O}$  solution onto Magadi water

Video S13: Synthesis of mineral vesicles by adding saturated  $\text{MgCl}_2 \cdot 6\text{H}_2\text{O}$  solution onto Magadi water

Video S14: Synthesis of mineral vesicles by adding saturated  $\text{FeCl}_2 \cdot 4\text{H}_2\text{O}$  solution onto Magadi water

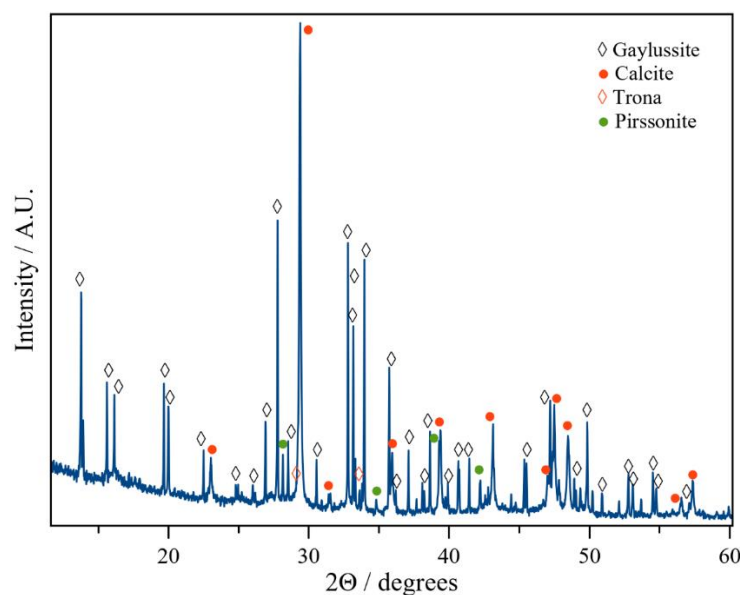

**Figure S1:** Powder X-ray diffraction of mineral gardens synthesized by immersing  $\text{CaCl}_2 \cdot 2\text{H}_2\text{O}$  pellets in Lake Magadi water

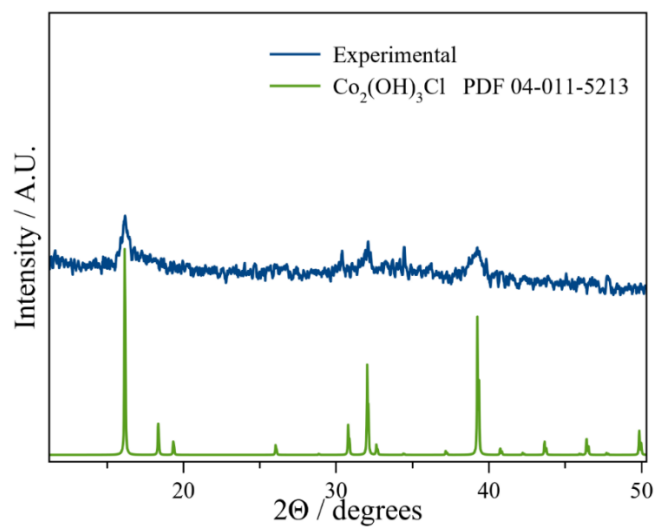

**Figure S2:** Powder X-ray diffraction of mineral gardens produced by immersing  $\text{CoCl}_2 \cdot 6\text{H}_2\text{O}$  pellet in Magadi water

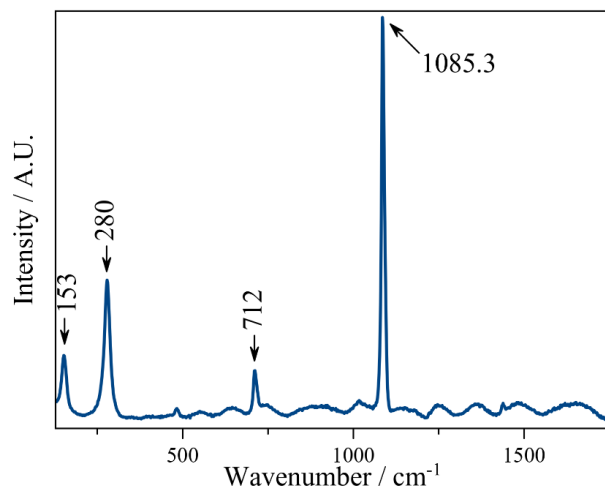

**Figure S3:** Raman spectra of mineral vesicles synthesized by adding drops of saturated  $\text{CaCl}_2 \cdot 2\text{H}_2\text{O}$  solution onto Lake Magadi water (153, 280, 712, and 1085.3  $\text{cm}^{-1}$  are translational, librational, in-plane bending and symmetric stretching modes respectively)

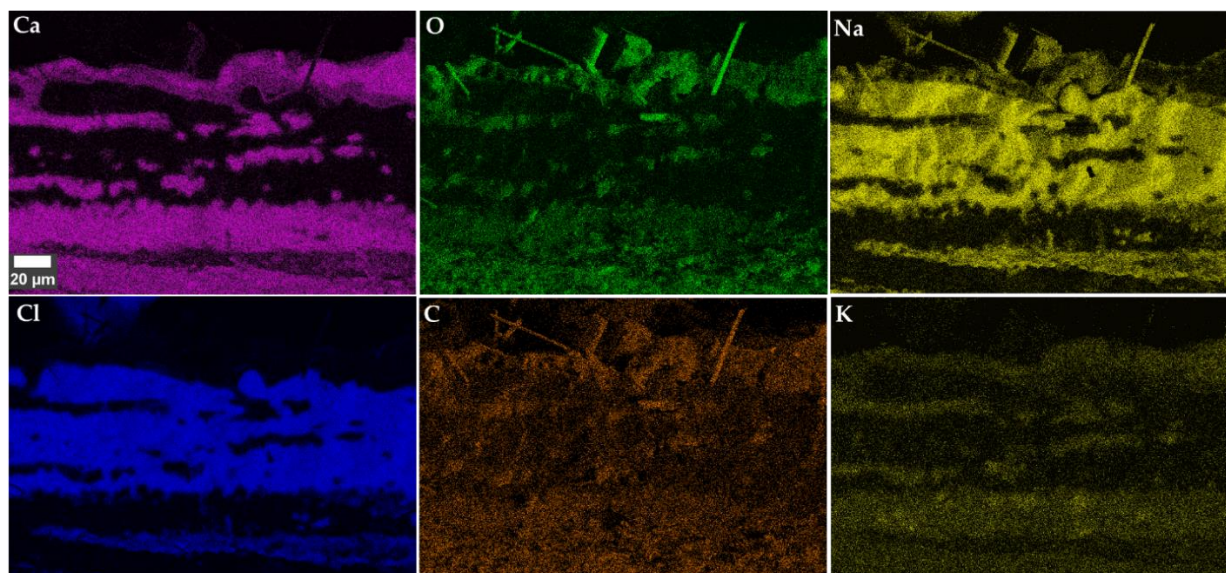

**Figure S4:** EDX mapping of membrane cross-section of vesicles synthesized by adding saturated  $\text{CaCl}_2 \cdot 2\text{H}_2\text{O}$  solution onto Lake Magadi water

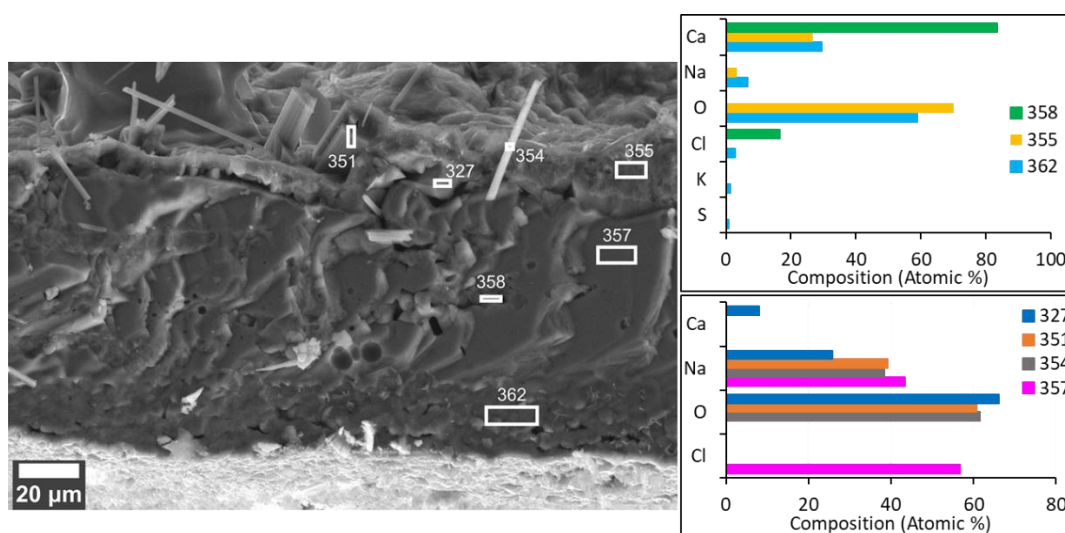

**Figure S5:** EDX analysis of membrane cross-section of vesicles synthesized by adding saturated  $\text{CaCl}_2 \cdot 2\text{H}_2\text{O}$  solution onto Lake Magadi water

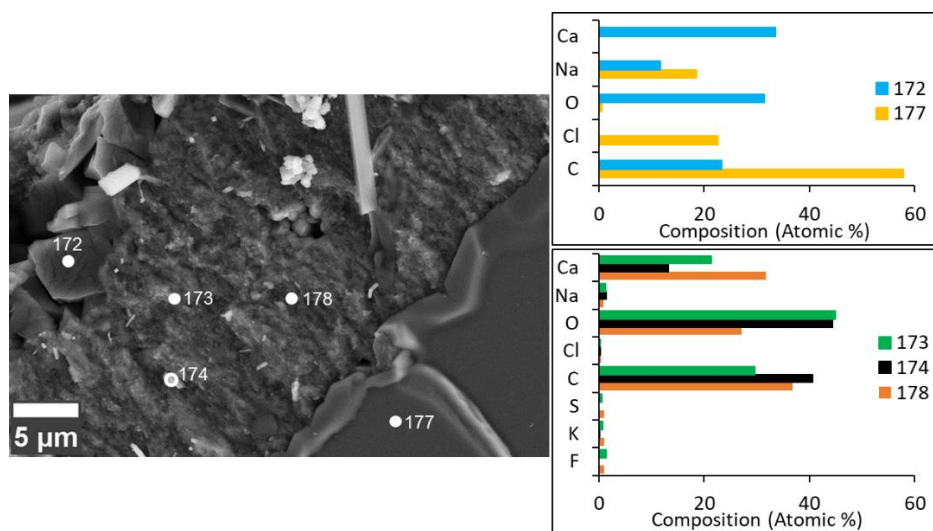

**Figure S6:** EDX analysis of calcium mineral membrane cross-section containing gaylussite

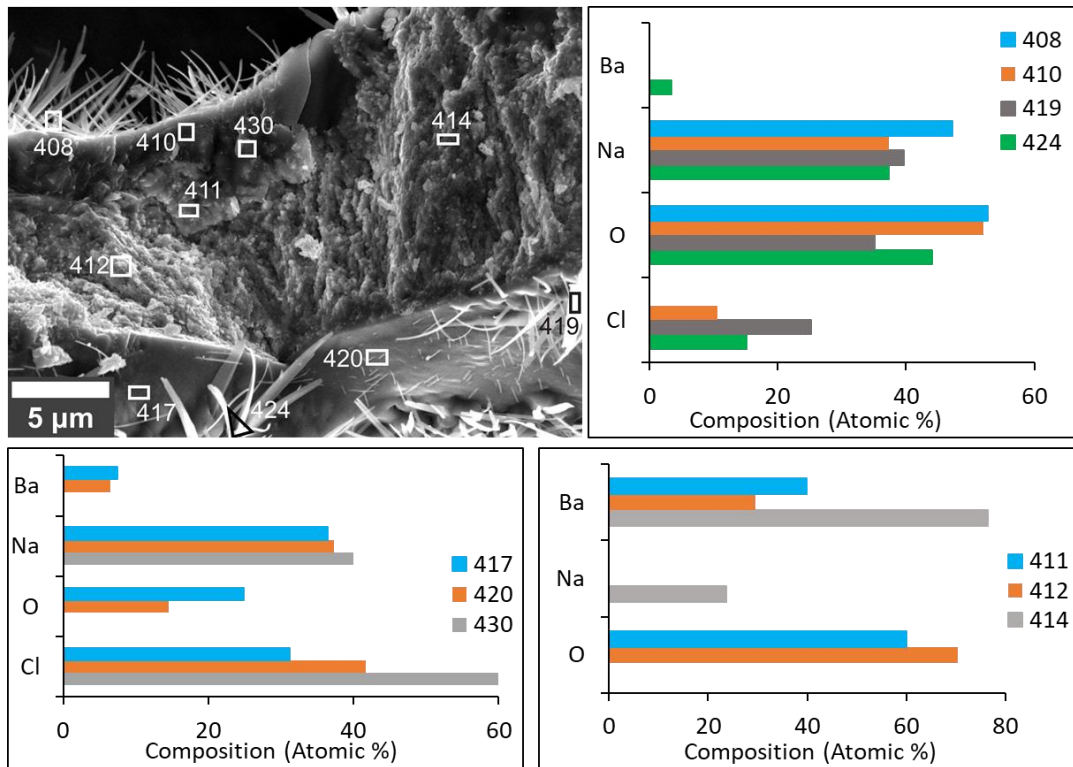

**Figure S7:** EDX analysis of membrane cross-section of vesicles synthesized by adding saturated  $\text{BaCl}_2 \cdot 2\text{H}_2\text{O}$  solution onto Lake Magadi water

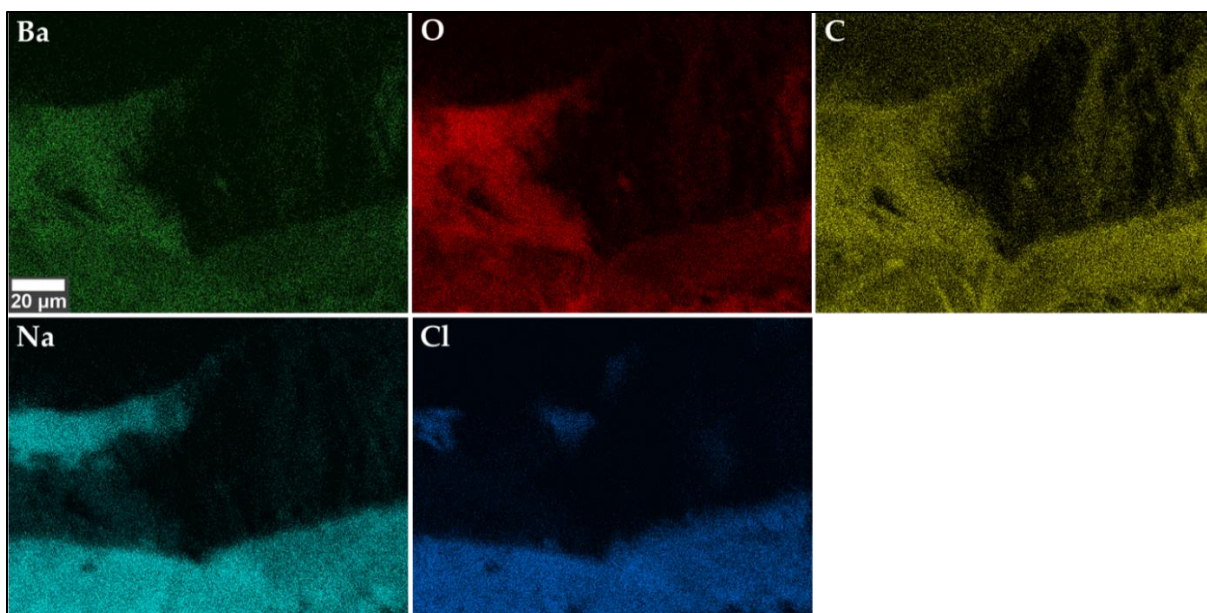

**Figure S8:** EDX mapping of membrane cross-section of vesicles synthesized by adding saturated  $\text{BaCl}_2 \cdot 2\text{H}_2\text{O}$  solution onto Lake Magadi water

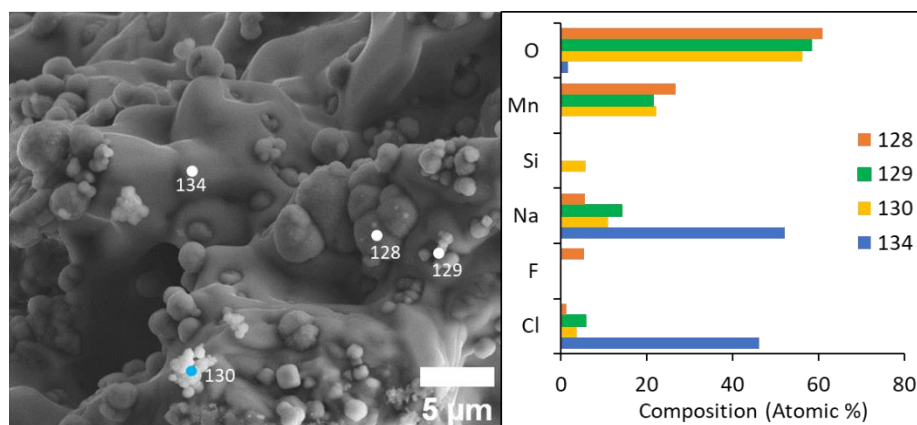

**Figure S9:** EDX analysis of the cross-section of mineral vesicles synthesized by adding saturated  $\text{MnCl}_2 \cdot 4\text{H}_2\text{O}$  solution onto Magadi water

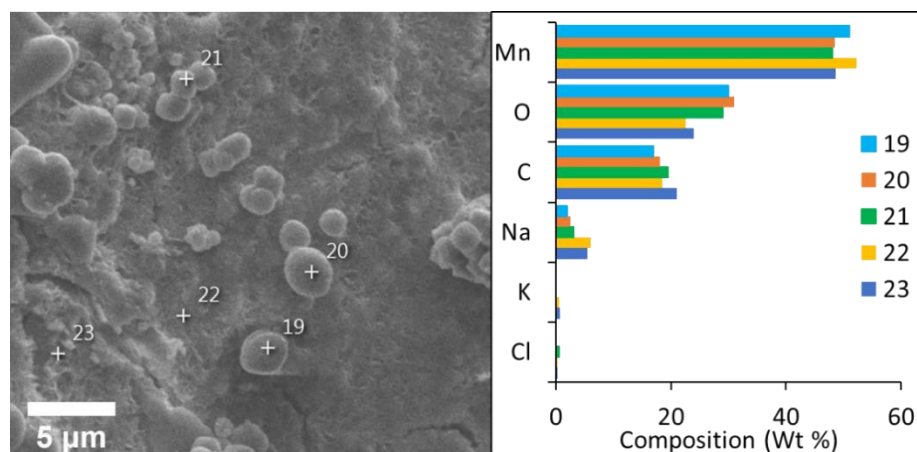

**Figure S10:** EDX analysis of the interior surface of mineral vesicles synthesized by adding saturated  $\text{MnCl}_2 \cdot 4\text{H}_2\text{O}$  solution onto Magadi water

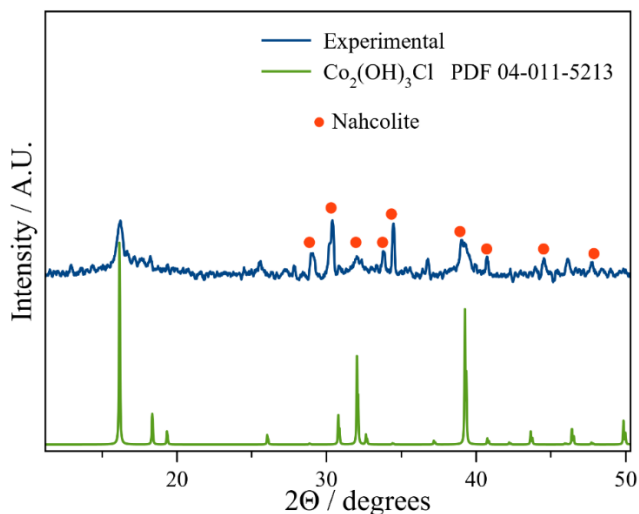

**Figure S11:** Powder X-ray diffraction of mineral vesicles synthesized by adding saturated  $\text{Co}(\text{NO}_3)_2 \cdot 6\text{H}_2\text{O}$  solution onto Lake Magadi water

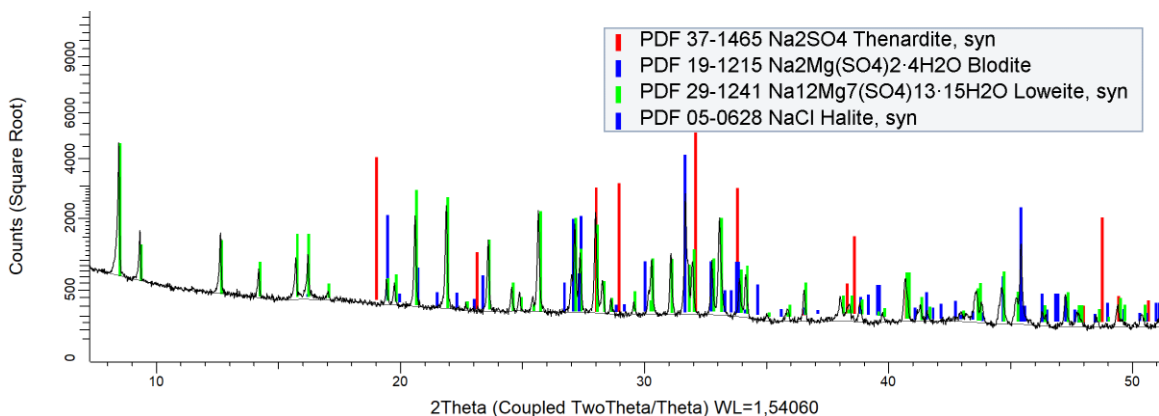

**Figure S12:** Powder X-ray diffraction of mineral vesicles synthesized by adding saturated  $\text{MgSO}_4$  solution onto Lake Magadi water

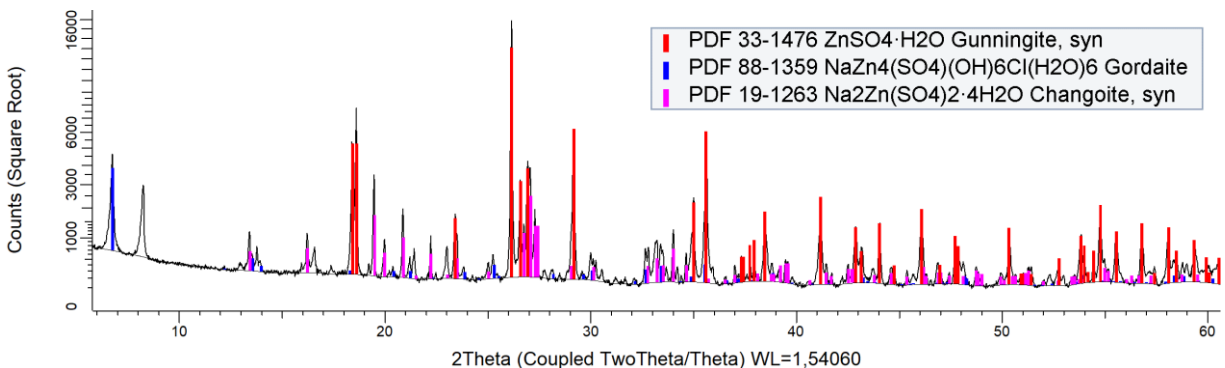

**Figure S13:** Powder X-ray diffraction of mineral vesicles synthesized by adding saturated  $\text{ZnSO}_4 \cdot 7\text{H}_2\text{O}$  solution onto Lake Magadi water
